# Supplementary material for: Molecular epidemiology of SARS-CoV-2 isolated from COVID-19 family clusters
Source: BMC Med Genomics. 2021 Jun 1;14:144. doi: 10.1186/s12920-021-00990-3 (PMC8169432; doi:10.1186/s12920-021-00990-3)
Supplement: Supplementary file 1 — Additional file 1: Table S1. Ninety-four SNPs were detected throughout the ORP of the SARS-CoV-2 virus samples with 60% (54/94) of the nucleic acid changes resulting in amino acid substitutions (missense mutations). [file 12920_2021_990_MOESM1_ESM.xlsx]

## Sheet: NA-AA Changes
No	Virus Name (Acession Number)	NSP2							NSP3													NSP4	NSP5				NSP6	NSP8		NSP9	NSP12 (RdRp)												NSP13
NA position starting from 5-UTR -->		1419	1545	1572	1766	2110	2263	2512	3037	3529	3615	4084	4754	5184	5784	5806	6255	6312	6780	7639	7713	9246	10089	10201	10507	10604	11083	12152	12439	12809	13730	14055	14120	14183	14292	14408	14694	15406	15543	15765	16114	16156	16395	16461	16616	16647	16694	16741	17010
NA position starting from ORF1ab gene -->		1154	1280	1307	1501	1845	1998	2247	2772	3264	3350	3819	4489	4919	5519	5541	5990	6047	6515	7374	7448	8981	9824	9936	10242	10339	10818	11887	12174	12544	13465	13790	13855	13918	14027	14143	14429	15141	15278	15500	15849	15891	16130	16196	16351	16382	16429	16476	16745
Ref	hCoV-19/Wuhan/Hu-1/2019 (NC_045512.2)	C	C	C	C	C	C	A	C	T	T	C	C	C	C	C	C	C	T	C	C	C	A	G	C	C	G	G	C	C	C	G	C	C	C	C	C	G	G	A	C	A	A	T	C	G	C	G	C
1	hCoV-19/Indonesia/YO-UGM-10001/2020 (EPI_ISL_576113)	C	T*	C	C	C	C	A	T	T	T	T	C	T*	C	C	C	C	T	C	C	C	G*	G	T	C	G	G	C	C	C	G	C	T*	C	T*	C	G	G	A	C	A	T	T	C	T	C	G	C
2	hCoV-19/Indonesia/YO-UGM-10002/2020 (EPI_ISL_576114)	C	C	T*	C	C	C	A	T	T	T	T	C	T*	C	C	C	C	T	C	C	C	G*	G	T	C	G	G	C	C	C	G	C	T*	C	T*	C	G	G	A	C	A	T	T	C	T	C	G	C
3	hCoV-19/Indonesia/YO-UGM-10003/2020 (EPI_ISL_576115)	C	T*	C	C	C	C	A	T	T	T	T	C	T*	C	C	C	C	T	C	C	C	G*	G	T	C	G	G	C	C	C	G	C	T*	C	T*	C	G	G	A	C	A	T	T	C	T	C	G	C
4	hCoV-19/Indonesia/YO-UGM-10004/2020 (EPI_ISL_576116)	C	C	C	C	C	C	A	T	T	C*	C	C	T*	C	C	C	C	T	C	C	T*	A	G	T	C	G	G	C	C	C	G	C	C	C	T*	C	G	G	A	C	A	A	T	T*	G	C	G	T
5	hCoV-19/Indonesia/YO-UGM-10005/2020 (EPI_ISL_576128)	C	C	T*	A*	C	C	A	T	T	T	C	C	T*	C	C	C	C	T	C	C	C	A	G	C	C	G	G	C	C	C	G	C	C	C	T*	C	G	G	A	T*	A	A	T	C	G	C	G	C
6	hCoV-19/Indonesia/YO-UGM-10006/2020 (EPI_ISL_576130)	C	C	T*	A*	C	C	A	T	T	T	C	C	T*	C	C	C	C	T	C	C	C	A	G	C	C	G	G	C	C	C	G	C	C	C	T*	C	G	G	A	T*	A	A	T	C	G	C	G	C
7	hCoV-19/Indonesia/YO-UGM-10007/2020 (EPI_ISL_632936)	C	C	C	C	T	C	A	T	T	T	C	C	T*	C	C	T*	C	G*	C	T*	C	A	G	C	C	G	G	C	C	C	G	C	C	C	T*	C	G	G	A	C	A	A	C	C	G	C	G	C
8	hCoV19/Indonesia/YO-UGM-781481/2020 (EPI_ISL_516829)	C	C	C	C	C	C	A	T	C	T	C	T*	C	C	C	C	C	T	C	C	C	A	G	C	C	G	G	C	C	C	G	C	C	T	T*	T	T*	G	A	C	A	A	T	C	G	C	G	C
9	hCoV19/Indonesia/YO-UGM-202449/2020 (EPI_ISL_516800)	C	C	C	C	C	C	A	T	T	T	C	C	T*	C	C	C	C	T	C	C	C	A	G	T	C	G	G	C	C	C	G	C	C	C	T*	C	G	G	A	C	A	A	T	C	G	C	G	C
10	hCov19/Indonesia/JT-UGM-202538/2020 (EPI_ISL_525492)	C	C	C	C	C	C	A	T	T	T	C	C	T*	C	C	C	C	T	C	C	C	A	G	T	C	G	G	C	C	C	T	C	C	C	T*	C	G	G	A	C	A	A	T	C	G	C	G	C
11	hCoV19/Indonesia/YO-UGM-200927/2020 (EPI_ISL_516806)	C	C	C	C	C	C	A	C	T	T	C	C	C	C	C	C	C	T	C	C	C	A	T*	C	C	G	G	C	C	C	G	C	C	C	C	C	G	G	A	C	A	A	T	C	G	C	G	C
12	hCoV-19/Indonesia/JT-UGM-47906/2020 (EPI_ISL_576383)	T*	C	C	C	C	C	A	T	T	T	C	C	C	C	T	C	C	T	C	C	C	A	G	C	C	G	G	C	C	C	G	C	C	C	T*	C	G	G	A	C	A	A	T	C	G	C	G	C
13	hCoV-19/Indonesia/JT-UGM-47964/2020 (EPI_ISL_610162)	C	C	C	C	C	C	G	C	T	T	C	C	C	C	C	C	A*	T	C	C	C	A	G	C	C	T*	A*	T	T*	T*	G	C	C	C	C	C	G	G	A	C	G*	A	T	C	G	T*	G	C
14	hCoV-19/Indonesia/JT-UGM-48660/2020 (EPI_ISL_610161)	C	C	C	C	C	C	A	T	T	T	T	C	T*	C	C	C	C	T	C	C	C	G*	G	T	C	G	G	C	C	C	G	C	C	C	T*	C	G	G	A	C	A	A	T	C	T	C	T*	C
15	hCoV-19/Indonesia/YO-UGM-00061/2020 (EPI_ISL_575331)	C	C	C	C	C	T	A	T	T	T	C	C	T*	T*	C	C	C	T	T	C	C	A	G	T	C	G	G	C	C	C	G	C	C	C	T*	C	G	T	A	C	A	A	T	C	G	C	G	C
16	hCoV-19/Indonesia/YO-UGM-48651/2020 (EPI_ISL_632937)	C	C	C	C	C	C	A	T	T	T	C	C	C	C	C	C	C	T	C	C	C	A	G	C	C	G	G	C	C	C	G	T*	C	C	T*	C	G	G	G	C	A	A	T	C	G	C	G	C
17	hCoV-19/Indonesia/YO-UGM-107727/2020 (EPI_ISL_576145)	C	C	C	C	C	C	A	T	T	T	C	C	C	C	T	C	C	T	C	C	C	A	G	C	T*	G	G	C	C	C	G	C	C	C	T*	C	G	G	A	C	A	A	T	C	G	C	G	C
No	Virus Name (Acession Number)	NSP2							NSP3													NSP4	NSP5				NSP6	NSP8		NSP9	NSP12 (RdRp)												NSP13
Amino acid position in each gene -->		205	247	256	321	435	486	569	106	270	299	443	679	822	1022	1029	1179	1198	1354	1640	1665	231	12	49	151	184	37	21	116	42	97	205	227	248	284	323	418	656	701	775	892	906	53	75	127	137	153	169	258
Ref	hCoV-19/Wuhan/Hu-1/2019 (NC_045512.2)	A	V	T	Q	N	T	R	F	D	V	G	P	P	T	C	A	T	F	F	P	A	K	M	N	P	L	A	P	L	A	L	P	T	D	P	D	A	T	L	H	M	P	H	T	T	T	V	I
1	hCoV-19/Indonesia/YO-UGM-10001/2020 (EPI_ISL_576113)	A	A	T	Q	N	T	R	F	D	V	G	P	L	T	C	A	T	F	F	P	A	R	M	N	P	L	A	P	L	A	L	P	I	D	L	D	A	T	L	H	M	P	H	T	T	T	V	I
2	hCoV-19/Indonesia/YO-UGM-10002/2020 (EPI_ISL_576114)	A	V	I	Q	N	T	R	F	D	V	G	P	L	T	C	A	T	F	F	P	A	R	M	N	P	L	A	P	L	A	L	P	I	D	L	D	A	T	L	H	M	P	H	T	T	T	V	I
3	hCoV-19/Indonesia/YO-UGM-10003/2020 (EPI_ISL_576115)	A	A	T	Q	N	T	R	F	D	V	G	P	L	T	C	A	T	F	F	P	A	R	M	N	P	L	A	P	L	A	L	P	I	D	L	D	A	T	L	H	M	P	H	T	T	T	V	I
4	hCoV-19/Indonesia/YO-UGM-10004/2020 (EPI_ISL_576116)	A	V	T	Q	N	T	R	F	D	A	G	P	L	T	C	A	T	F	F	P	V	K	M	N	P	L	A	P	L	A	L	P	T	D	L	D	A	T	L	H	M	P	H	I	T	T	V	I
5	hCoV-19/Indonesia/YO-UGM-10005/2020 (EPI_ISL_576128)	A	V	I	K	N	T	R	F	D	V	G	P	L	T	C	A	T	F	F	P	A	K	M	N	P	L	A	P	L	A	L	P	T	D	L	D	A	T	L	Y	M	P	H	T	T	T	V	I
6	hCoV-19/Indonesia/YO-UGM-10006/2020 (EPI_ISL_576130)	A	V	I	K	N	T	R	F	D	V	G	P	L	T	C	A	T	F	F	P	A	K	M	N	P	L	A	P	L	A	L	P	T	D	L	D	A	T	L	Y	M	P	H	T	T	T	V	I
7	hCoV-19/Indonesia/YO-UGM-10007/2020 (EPI_ISL_632936)	A	V	T	Q	N	T	R	F	D	V	G	P	L	T	C	V	T	C	F	L	A	K	M	N	P	L	A	P	L	A	L	P	T	D	L	D	A	T	L	H	M	P	H	T	T	T	V	I
8	hCoV19/Indonesia/YO-UGM-781481/2020 (EPI_ISL_516829)	A	V	T	Q	N	T	R	F	D	V	G	S	P	T	C	A	T	F	F	P	A	K	M	N	P	L	A	P	L	A	L	P	T	D	L	D	S	T	L	H	M	P	H	T	T	T	V	I
9	hCoV19/Indonesia/YO-UGM-202449/2020 (EPI_ISL_516800)	A	V	T	Q	N	T	R	F	D	V	G	P	L	T	C	A	T	F	F	P	A	K	M	N	P	L	A	P	L	A	L	P	T	D	L	D	A	T	L	H	M	P	H	T	T	T	V	I
10	hCov19/Indonesia/JT-UGM-202538/2020 (EPI_ISL_525492)	A	V	T	Q	N	T	R	F	D	V	G	P	L	T	C	A	T	F	F	P	A	K	M	N	P	L	A	P	L	A	L	P	T	D	L	D	A	T	L	H	M	P	H	T	T	T	V	I
11	hCoV19/Indonesia/YO-UGM-200927/2020 (EPI_ISL_516806)	A	V	T	Q	N	T	R	F	D	V	G	P	P	T	C	A	T	F	F	P	A	K	I	N	P	L	A	P	L	A	L	P	T	D	P	D	A	T	L	H	M	P	H	T	T	T	V	I
12	hCoV-19/Indonesia/JT-UGM-47906/2020 (EPI_ISL_576383)	V	V	T	Q	N	T	R	F	D	V	G	P	P	T	C	A	T	F	F	P	A	K	M	N	P	L	A	P	L	A	L	P	T	D	L	D	A	T	L	H	M	P	H	T	T	T	V	I
13	hCoV-19/Indonesia/JT-UGM-47964/2020 (EPI_ISL_610162)	A	V	T	Q	N	T	R	F	D	V	G	P	P	T	C	A	K	F	F	P	A	K	M	N	P	F	T	P	F	V	L	P	T	D	P	D	A	T	L	H	V	P	H	T	T	I	V	I
14	hCoV-19/Indonesia/JT-UGM-48660/2020 (EPI_ISL_610161)	A	V	T	Q	N	T	R	F	D	V	G	P	L	T	C	A	T	F	F	P	A	R	M	N	P	L	A	P	L	A	L	P	T	D	L	D	A	T	L	H	M	P	H	T	T	T	F	I
15	hCoV-19/Indonesia/YO-UGM-00061/2020 (EPI_ISL_575331)	A	V	T	Q	N	T	R	F	D	V	G	P	L	I	C	A	T	F	F	P	A	K	M	N	P	L	A	P	L	A	L	P	T	D	L	D	A	T	L	H	M	P	H	T	T	T	V	I
16	hCoV-19/Indonesia/YO-UGM-48651/2020 (EPI_ISL_632937)	A	V	T	Q	N	T	R	F	D	V	G	P	P	T	C	A	T	F	F	P	A	K	M	N	P	L	A	P	L	A	L	L	T	D	L	D	A	T	L	H	M	P	H	T	T	T	V	I
17	hCoV-19/Indonesia/YO-UGM-107727/2020 (EPI_ISL_576145)	A	V	T	Q	N	T	R	F	D	V	G	P	P	T	C	A	T	F	F	P	A	K	M	N	S	L	A	P	L	A	L	P	T	D	L	D	A	T	L	H	M	P	H	T	T	T	V	I
Nucleid acid variations (SNP) are coloured-shaded and those with asterisks indicate nucleic acid subtitutions that cause amino acid changes.
[truncated: 46 more columns]
